# Supplementary material for: Exposing high-activity (111) facet CoO octahedral loading MXene quantum dots for efficient and stable photocatalytic H2 evolution
Source: Royal Society of Chemistry journal article supplement (doi:10.1039/d3dt02090h), 2023-01-01
Supplement: d3dt02090h1.pdf [file d3dt02090h1.pdf]

## Supporting Information

### Exposing high-activity (111) facets CoO octahedral Loading

### MXene Quantum dots of Efficient

### and Stable Photocatalytic H<sub>2</sub> Evolution

Lan Ding\*, Siyang Wang, Yaoyao Tang, Xinyi Chen, Hongjun Zhou\*

State Key Laboratory of Heavy Oil Processing Beijing Key Laboratory of Biogas

Upgrading Utilization, China University of Petroleum-Beijing, Beijing 102249, China

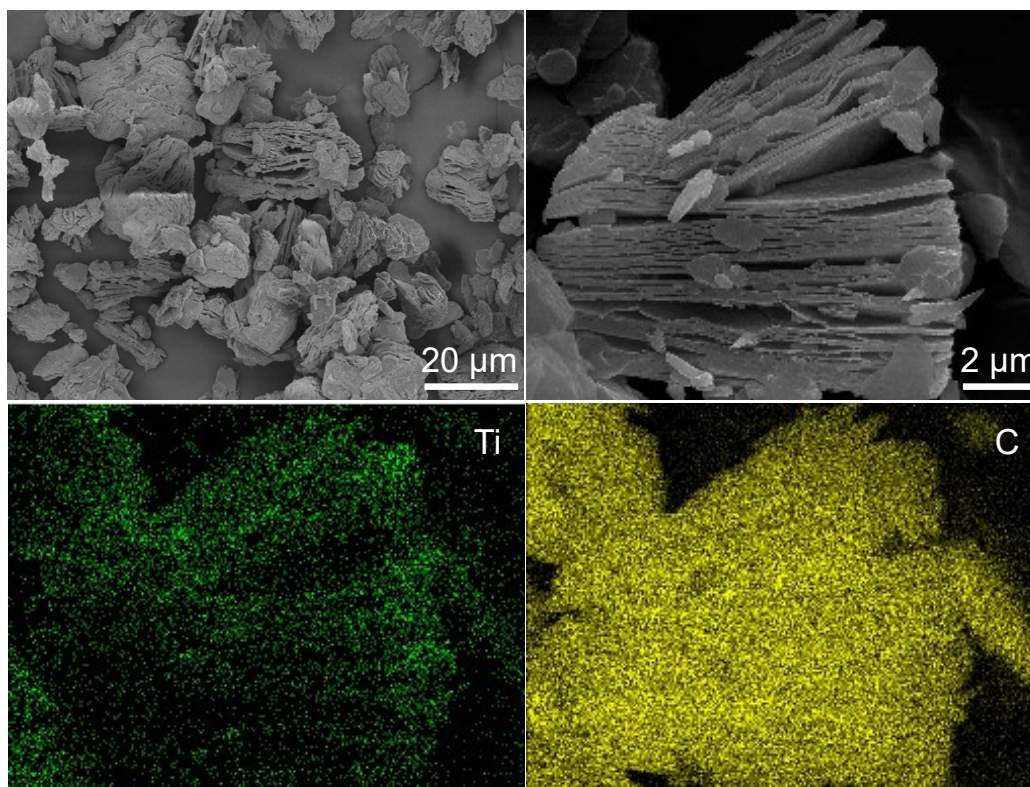

Fig. S1. SEM image and elements scanning for Ti<sub>3</sub>C<sub>2</sub> MXene.

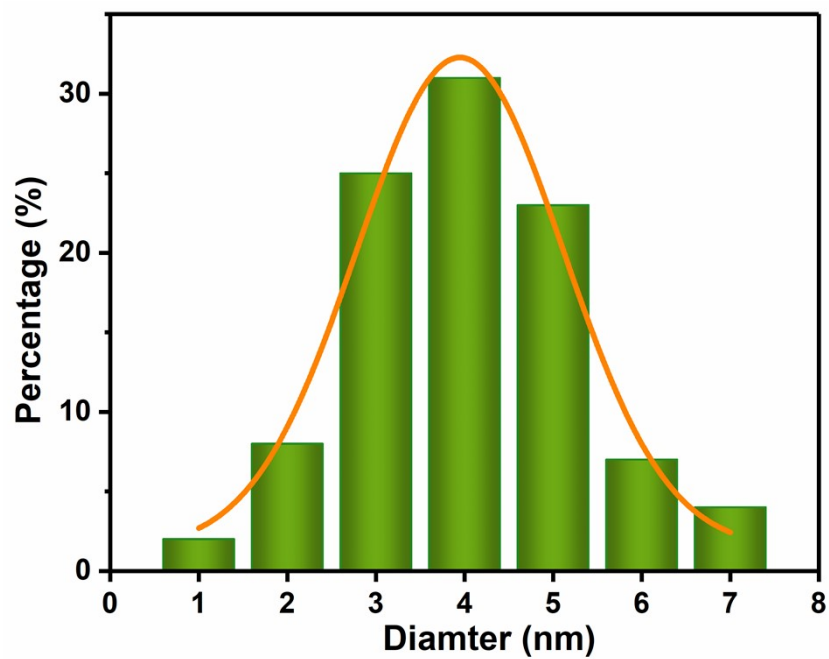

Fig. S2. Diameter distribution for N-MQDs.

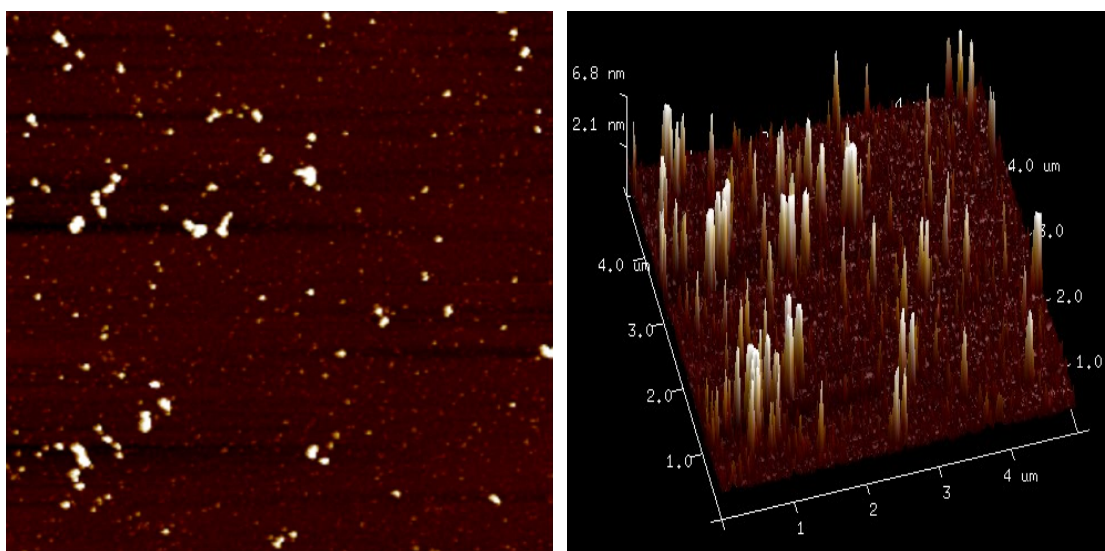

Fig. S3. AFM image and 3D AFM rendered image for N-MQDs

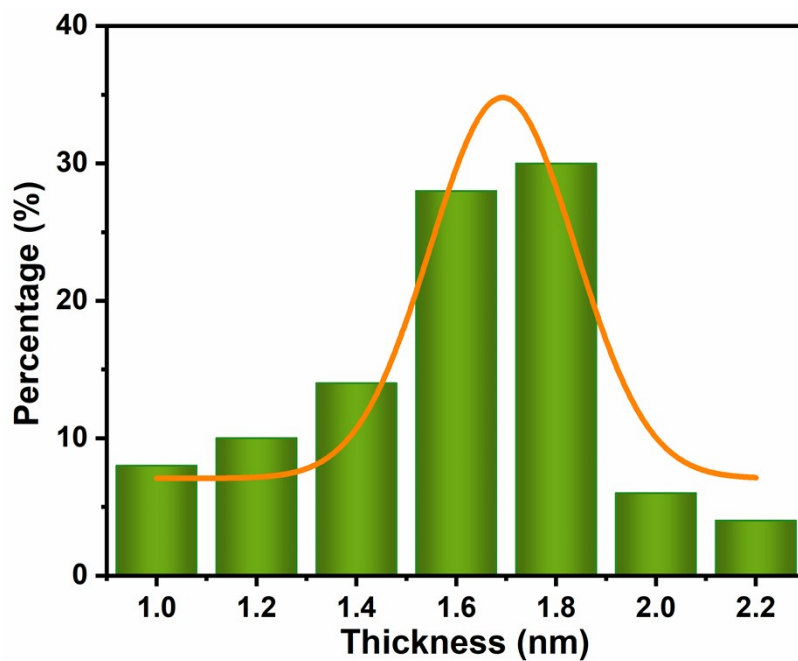

Fig. S4. The height size distribution for N-MQDs.

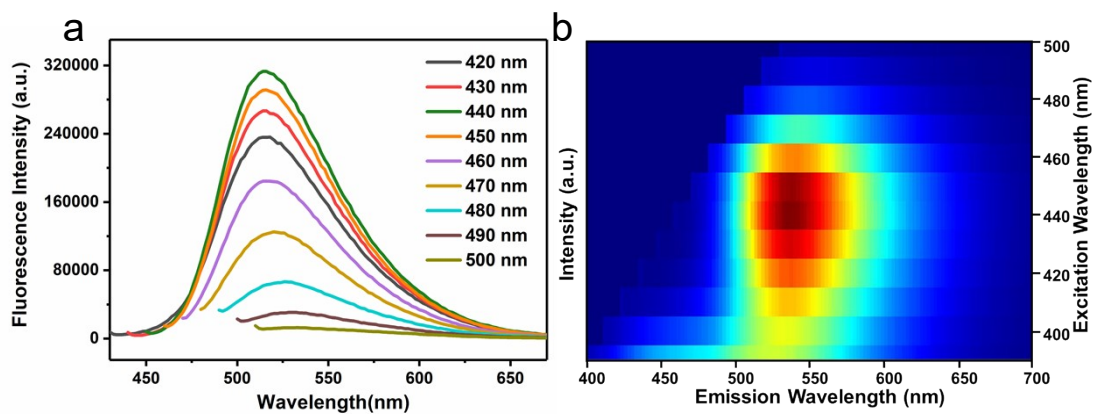

Fig. S5. (a) PL spectra for N-MQDs. (b) excitation-emission matrix.

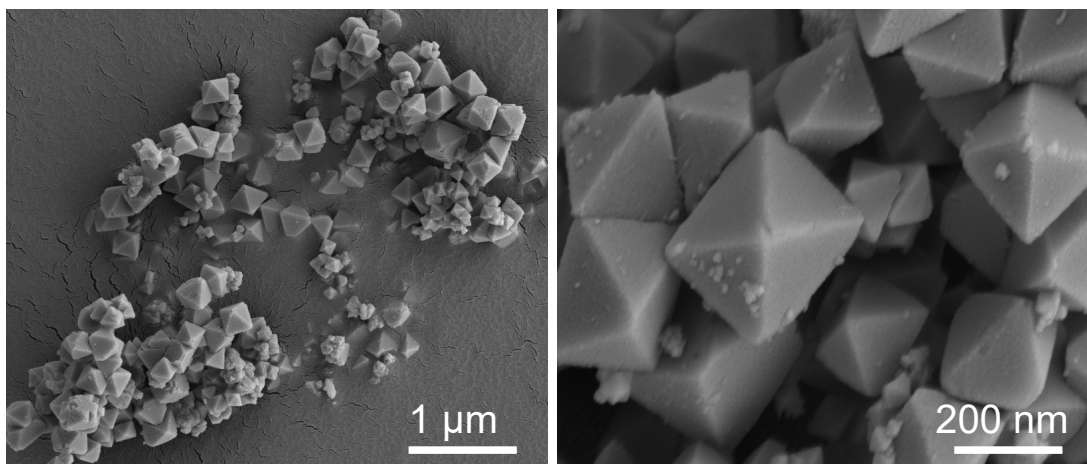

Fig. S6. SEM images for octahedral CoO.

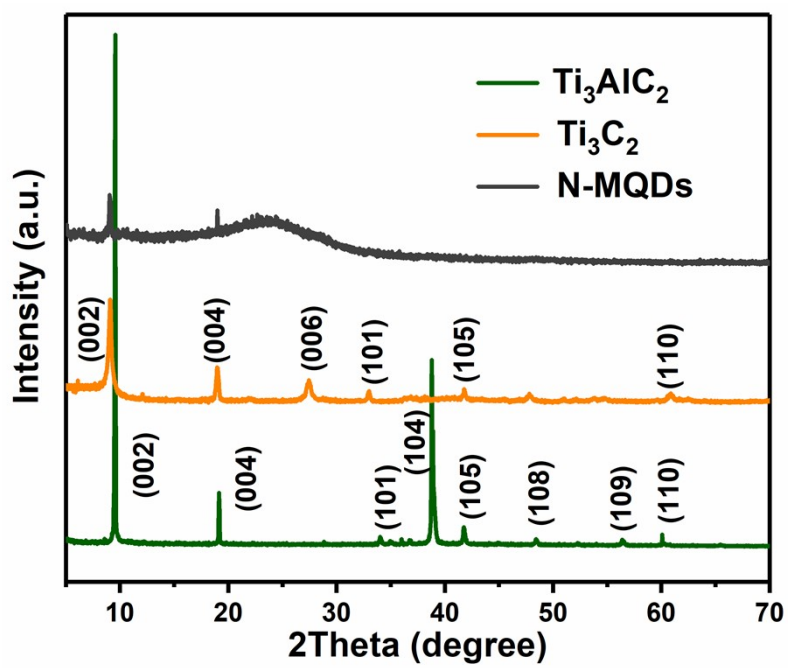

Fig. S7. XRD patterns for  $\text{Ti}_3\text{AlC}_2$  powder,  $\text{Ti}_3\text{C}_2$  MXene, and N-MQDs.

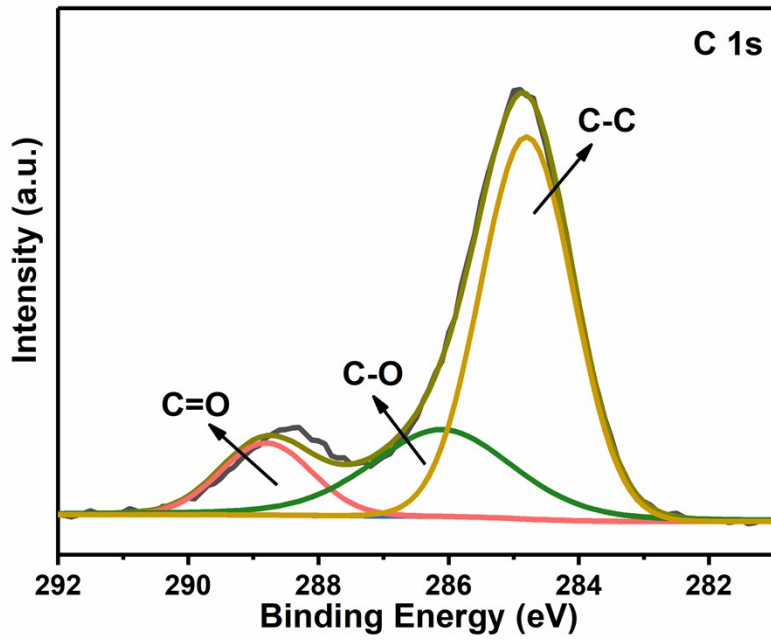

Fig. S8. C 1s XPS spectra for CoO.

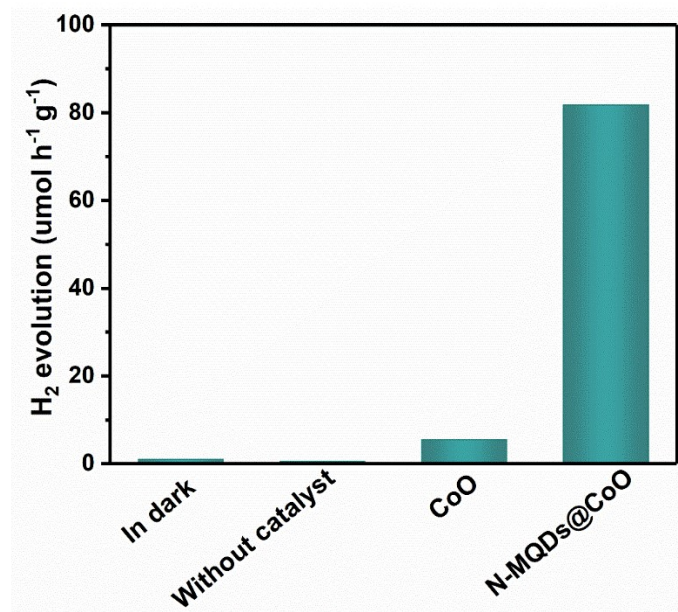

Fig. S9. The comparison of H<sub>2</sub> production rates with different environments.



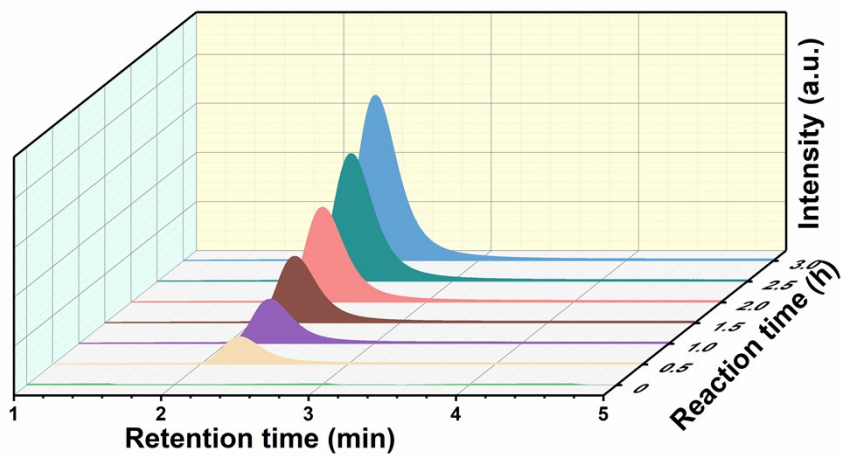

Fig. S10. Time-dependent gas chromatograms H<sub>2</sub> production for N-MQDs@CoO.

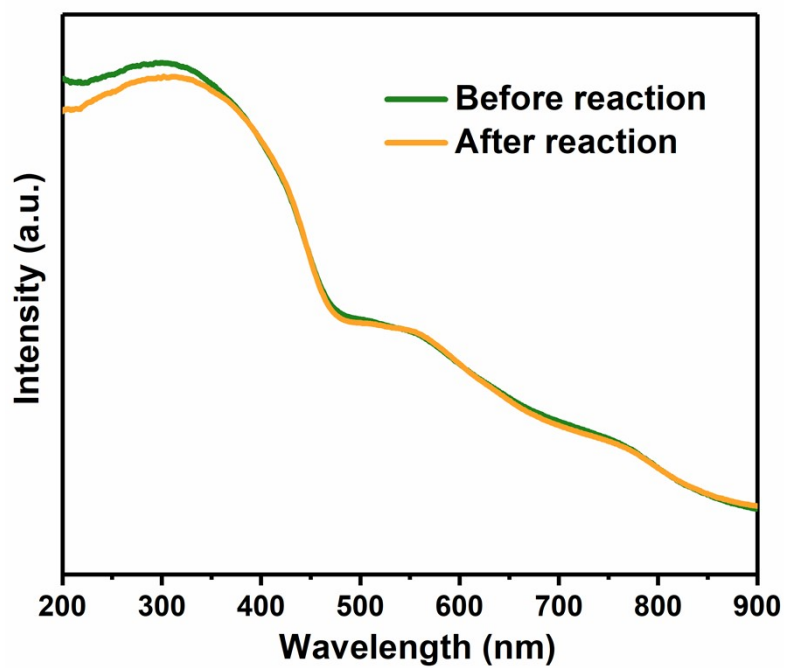

Fig. S11. (a) UV-visible DRS for the recycled catalyst after 4 cycles.

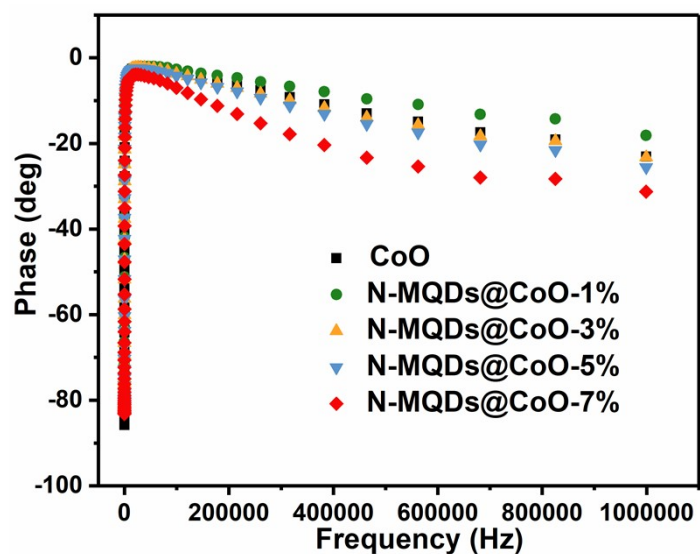

Fig. S12. The Bode-phase for pure CoO and N-MQDs@CoO.

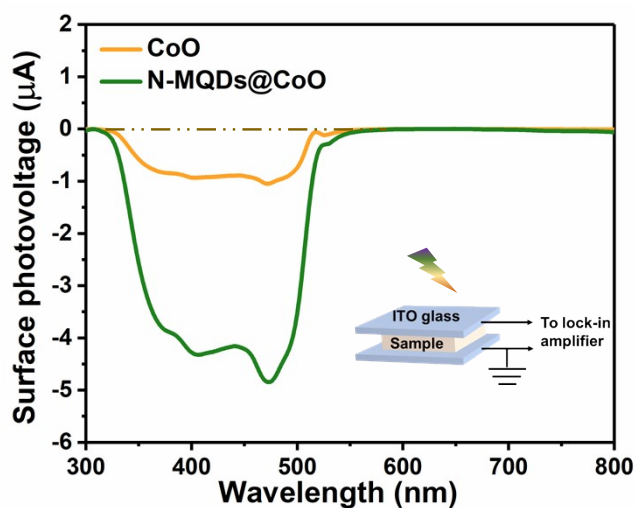

Fig. S13. The SPV spectrum for pure CoO and N-MQDs@CoO.

**Table S1.** Entries in the table are fitted from EIS results

| Sample        | $R_s/\Omega$ | $R_{ct}/\Omega$ | $C_p$                 |
|---------------|--------------|-----------------|-----------------------|
| CoO           | 27.72        | 23660           | $4.41 \times 10^{-4}$ |
| N-MQDs@CoO-1% | 18.65        | 16360           | $2.48 \times 10^{-3}$ |
| N-MQDs@CoO-3% | 9.02         | 4375            | $2.11 \times 10^{-4}$ |
| N-MQDs@CoO-5% | 4.48         | 1715            | $1.32 \times 10^{-4}$ |

|               |      |      |                       |
|---------------|------|------|-----------------------|
| N-MQDs@CoO-7% | 7.45 | 1044 | $1.91 \times 10^{-3}$ |
|---------------|------|------|-----------------------|

**Table S2.** The average fluorescence lifetimes for CoO and N-MQDs@CoO

| Sample        | lifetime<br>$\tau$ (ns) | Pre-exponential<br>Factors B | Average<br>lifetimes<br>$\tau$ (ns) | $X_2$ |
|---------------|-------------------------|------------------------------|-------------------------------------|-------|
| CoO           | $\tau_1=2.01$           | $B_1=3133.26$                | 2.19                                | 1.168 |
|               | $\tau_2=8.17$           | $B_2=36.55$                  |                                     |       |
| N-MQDs@CoO-1% | $\tau_1=3.26$           | $B_1=998.73$                 | 4.52                                | 1.098 |
|               | $\tau_2=9.94$           | $B_2=2042.98$                |                                     |       |
| N-MQDs@CoO-3% | $\tau_1=5.50$           | $B_1=921.90$                 | 6.39                                | 1.046 |
|               | $\tau_2=10.09$          | $B_2=2059.96$                |                                     |       |
| N-MQDs@CoO-5% | $\tau_1=7.22$           | $B_1=2906.34$                | 8.43                                | 1.063 |
|               | $\tau_2=15.98$          | $B_2=109.41$                 |                                     |       |
| N-MQDs@CoO-7% | $\tau_1=7.27$           | $B_1=2788.07$                | 6.81                                | 1.086 |
|               | $\tau_2=12.54$          | $B_2=274.42$                 |                                     |       |



**Table S3.** Comparison for different CoO-based materials

| Photocatalyst                       | Light source | Catalyst dosage (mg) | H <sub>2</sub> evolution rate             | Ref.      |
|-------------------------------------|--------------|----------------------|-------------------------------------------|-----------|
| N-MQDs@CoO                          | ≥ 420 nm     | 10                   | 81.6 μmol g <sup>-1</sup> h <sup>-1</sup> | This work |
| CoO@MoS <sub>2</sub>                | >400 nm      | 50                   | 21.4 μmol g <sup>-1</sup> h <sup>-1</sup> | [1]       |
| CoO/NiCo-LDH                        | >420 nm      | 40                   | 1.5 mmol g <sup>-1</sup> h <sup>-1</sup>  | [2]       |
| CoO/g-C <sub>3</sub> N <sub>4</sub> | >400 nm      | 50                   | 50.2 μmol g <sup>-1</sup> h <sup>-1</sup> | [3]       |
| CoP/CoO                             | >420 nm      | 50                   | 43.4 μmol g <sup>-1</sup> h <sup>-1</sup> | [4]       |
| a-CoO/GO                            | >400 nm      | 50                   | 21.1 μmol g <sup>-1</sup> h <sup>-1</sup> | [5]       |
| rGO@CoO                             | ≥ 420 nm     | 50                   | 830 μmol h <sup>-1</sup> g <sup>-1</sup>  | [6]       |
| CDs/CoO                             | >400 nm      | 50                   | 33.4 μmol g <sup>-1</sup> h <sup>-1</sup> | [7]       |

## References

- [1] Shi, W., Guo, F., Li, M., Shi, Y., Shi, M., Yan, C., 2019. Constructing 3D sub-micrometer CoO octahedrons packed with layered MoS<sub>2</sub> shell for boosting photocatalytic overall water splitting activity. *Appl. Surf. Sci.* 473, 928-933.
- [2] Wang, Y., Guo, S., Xin, X., Zhang, Y., Wang, B., Tang, S., Li, X., 2021. Effective interface contact on the hierarchical 1D/2D CoO/NiCo-LDH heterojunction for boosting photocatalytic hydrogen evolution. *Appl. Surf. Sci.* 549, 149108.
- [3] Guo, F., Shi, W., Zhu, C., Li, H., Kang, Z., 2018. CoO and g-C<sub>3</sub>N<sub>4</sub> complement each other for highly efficient overall water splitting under visible light. *Appl. Catal. B Environ.* 226, 412-420.
- [4] Guo, F., Huang, X., Chen, Z., Sun, H., Chen, L., 2021. Anchoring CoP nanoparticles on the octahedral CoO by self-phosphating for enhanced photocatalytic overall water

splitting activity under visible light. *Chin. J. Chem. Eng.* 40, 114-123.

[5] Lin, Z., Du, C., Yan, B., Yang, G., 2019. Two-dimensional amorphous CoO photocatalyst for efficient overall water splitting with high stability. *J. Catal.* 372, 299-310.

[6] Selvarajan, R., Vadivel, S., Saranya, A., Baraneedharan, P., Jayavel, R., 2022. Facile synthesis of rGO@CoO nanocomposites electrode material for photocatalytic hydrogen generation and supercapacitor applications. *Inorg. Chem. Commun.* 139, 109345.

[7] Shi, W., Guo, F., Zhu, C., Wang, H., Li, H., Huang, H., Liu, Y., Kang, Z., 2017. Carbon dots anchored on octahedral CoO as a stable visible-light-responsive composite photocatalyst for overall water splitting. *J. Mater. Chem. A* 5, 19800-19807.
